# Supplementary material for: Downregulation of AMPK Accompanies Leucine- and Glucose-Induced Increases in Protein Synthesis and Insulin Resistance in Rat Skeletal Muscle
Source: PubMed Central journal article supplement — Diabetes. 2010 Aug 3;59(10):2426–34. doi: 10.2337/db09-1870 (PMC3279521; doi:10.2337/db09-1870), 2010-08-03
Supplement: supp_db09-1870_db091870onlineappendix.pdf [file supp_db09-1870_db091870onlineappendix.pdf]

## Online appendix - Supplemental material

### *Online appendix Figure S1. Effect of leucine on p-mTOR, P-p70S6K*

EDL were incubated in Krebs-Henseleit solution containing 0, and 100  $\mu$ M of leucine for 1hr. Phosphorylation of mTOR and p70 S6 kinase were done by immunoblot and densitometric analysis. Results are means  $\pm$  SE, (n = 5).

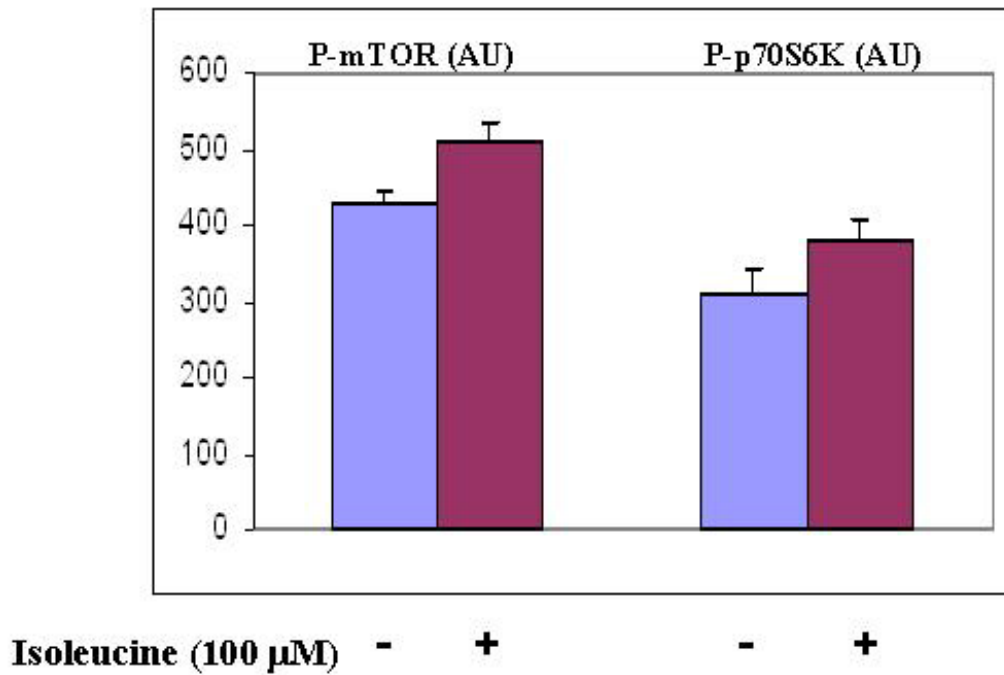

**Online appendix Figure S2. Effect of lipoic acid (ALA) on AMPK (A) and mTOR phosphorylation (B), protein synthesis (C) and insulin resistance (D).**

EDL were preincubated with Krebs-Henseleit solution containing 5.5 mM glucose for 20 min and then additional 1 h in the presence of ALA (100  $\mu$ M). For insulin resistance, EDL muscle were preincubated with glucose (25 mM) for 1 hour and then ALA for 1hr following 10 min incubation with insulin. Values are means  $\pm$  SE from 3 independent measurements \*,  $p < 0.01$  vs control (0  $\mu$ M ALA). \*,  $p < 0.01$  vs 5 mM glucose and \*\*,  $p < 0.05$  vs 25 mM glucose.

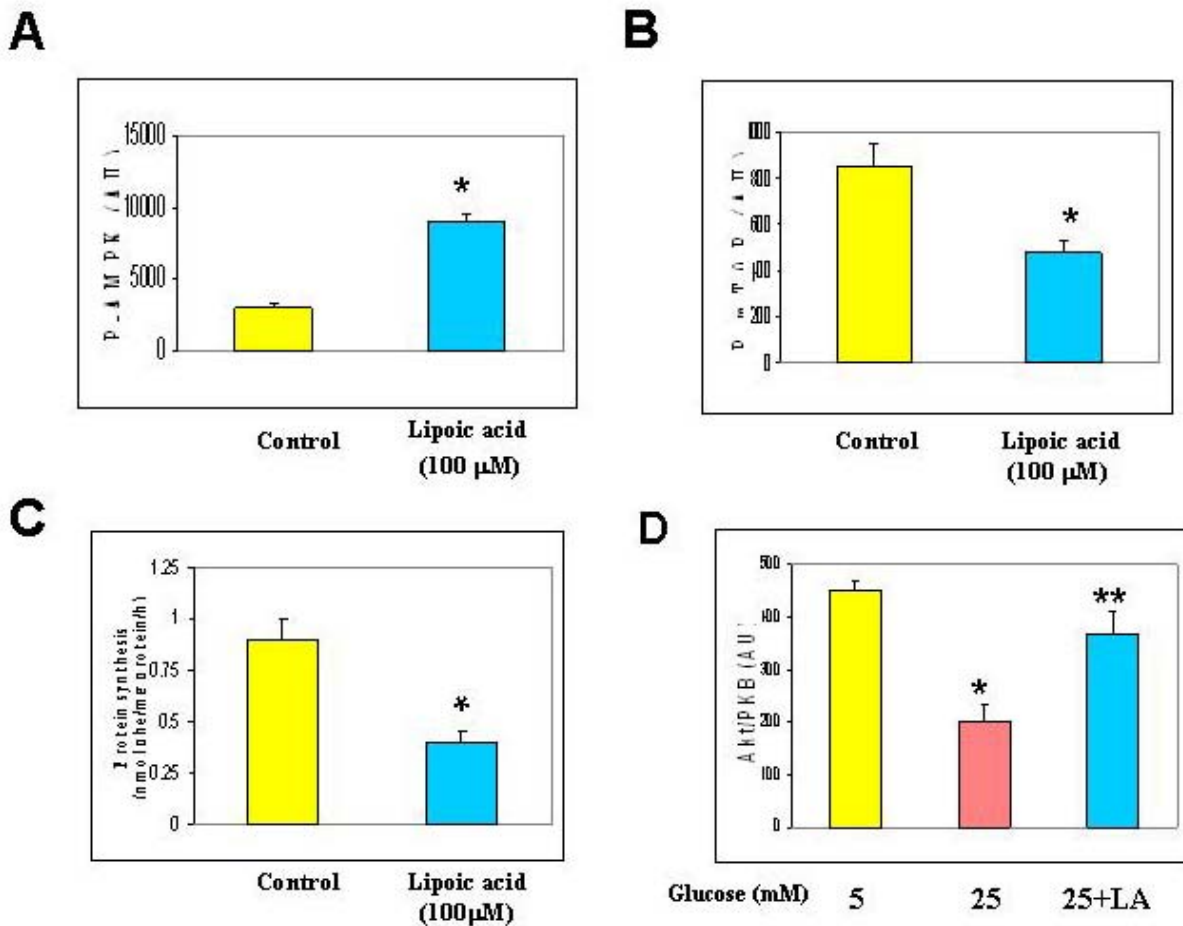

**Online appendix Figure S3. Inhibition of leucine induced mTOR/p70S6K phosphorylation does not suppress AMPK phosphorylation.**

EDL muscle were preincubated in the presence of rapamycin (100  $\mu$ M) for 30 min and then with or without leucine (200  $\mu$ M) for 1hr. Muscle lysates were analyzed for P-mTOR, P-p70S6K and P-AMPK using SDS-PAGE (Upper panel). The quantification of western blot (lower panel). Results are means  $\pm$  SE (n = 5). \*, p<0.01 relative to values for muscles with no leucine added to medium. \*\*, p<0.01 vs when compared to 200  $\mu$ M leucine, #, p<0.01 vs rapamycin.

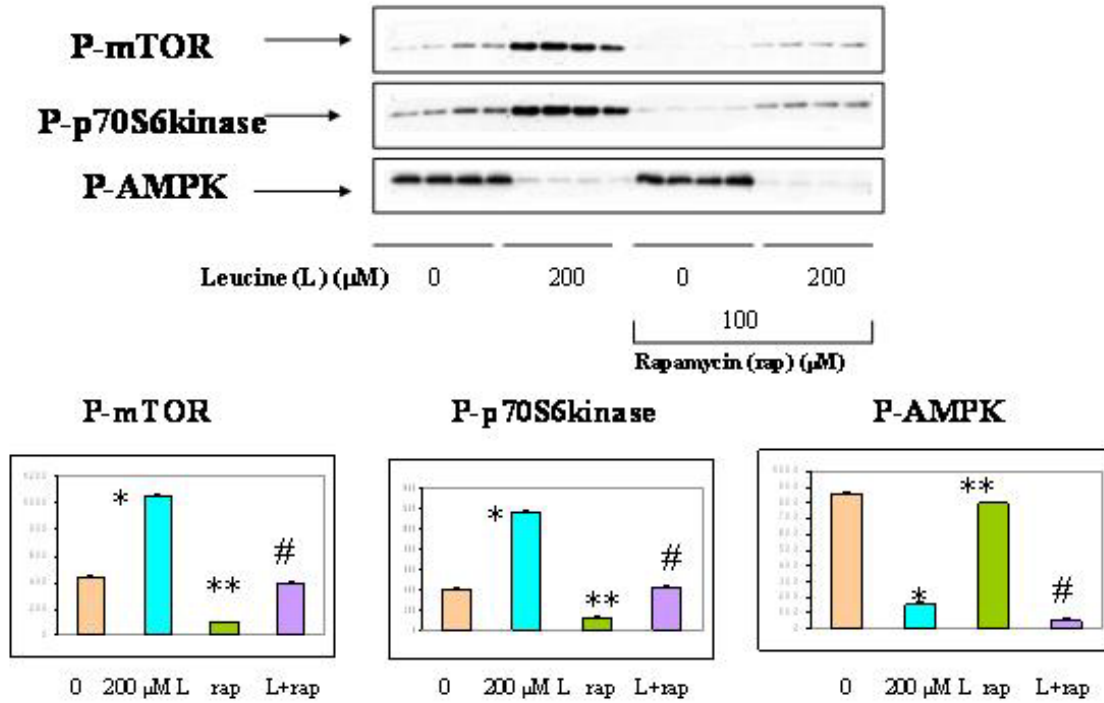

**Online appendix Figure S4. Effect of high glucose on SIRT1 protein abundance.**

EDL were incubated in 5.5 or 25 mM glucose for 1 h. Western blot analysis and quantification of representative blot shown. Results are means+SE (n=6).

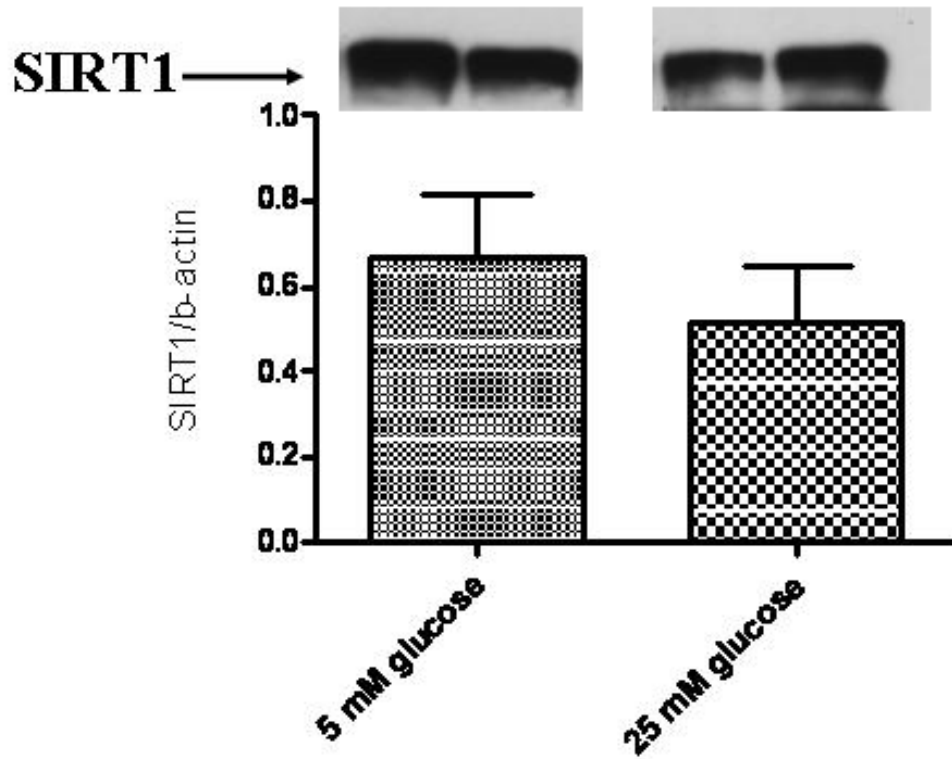

**Online appendix Figure S5. Phosphorylation of raptor in EDL muscle treated with AICAR, glucose and leucine.**

EDL were incubated in Krebs-Henseleit solution containing 25 mM glucose and 100  $\mu$ M of leucine for 1hr in the presence of 1 mM AICAR. Phosphorylation of raptor was done by immunoblot and densitometric analysis. Results are means  $\pm$  SE, (n = 6).

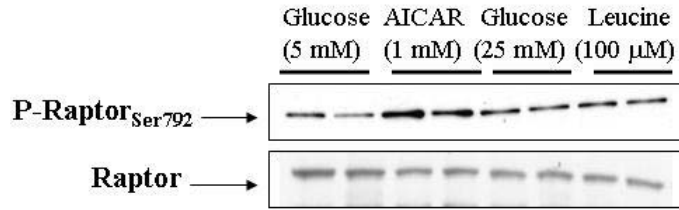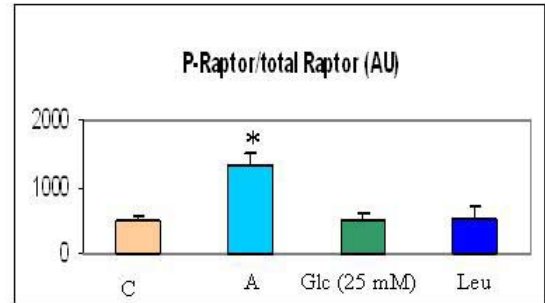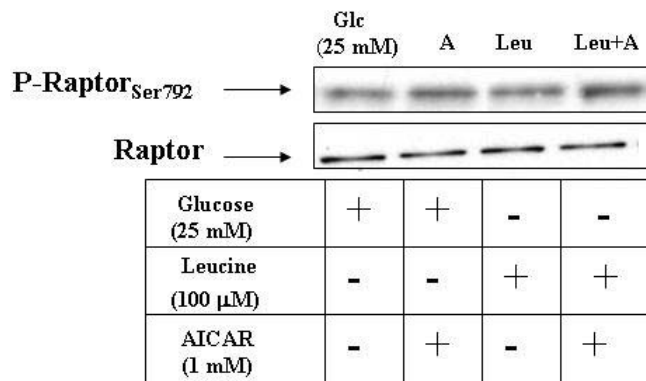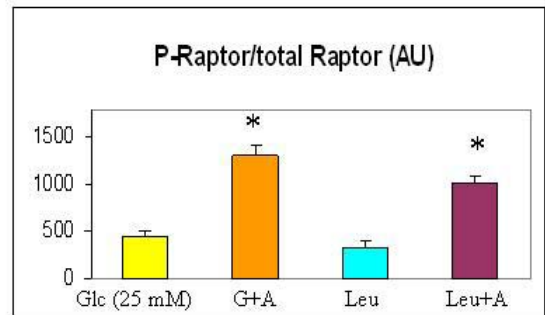

**Online appendix Figure S6. TSC2 Phosphorylation of raptor in EDL muscle treated with AICAR, glucose and leucine.**

EDL were incubated in Krebs-Henseleit solution containing 25 mM glucose and 100  $\mu$ M of leucine for 1hr in the presence of 1 mM AICAR. Phosphorylation of TSC2 was done by immunoblot and densitometric analysis. Results are means  $\pm$  SE, (n = 5).

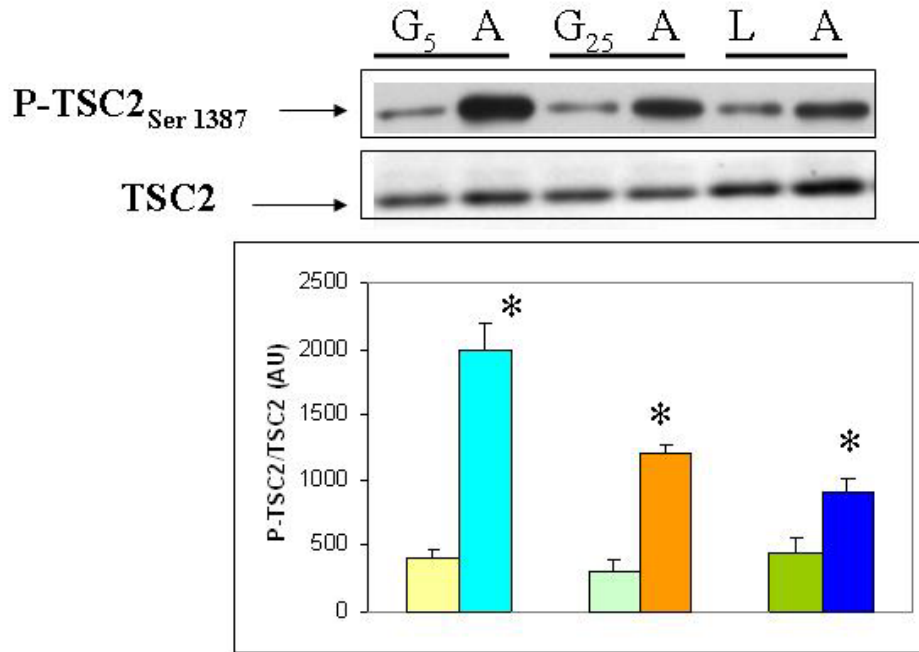

|                       |   |   |   |   |   |   |
|-----------------------|---|---|---|---|---|---|
| Glucose (5 mM)        | + | + | - | - | + | - |
| AICAR (1 mM)          | - | + | - | + | - | + |
| Glucose (25 mM)       | - | - | + | + | - | - |
| Leucine (100 $\mu$ M) | - | - | - | - | + | + |

**Online appendix Figure S7. Hypothetical mechanism by which leucine and glucose stimulate protein synthesis and cause insulin resistance in skeletal muscle.**

Based on the evidence presented here they do so by decreasing AMPK activity, which in turn leads to an increase in mTOR/p70S6 kinase signaling. A logical assumption is that the insulin resistance is a normal physiological event and is readily reversible. The mechanism by which leucine and glucose decreases AMPK activity has yet to be determined.

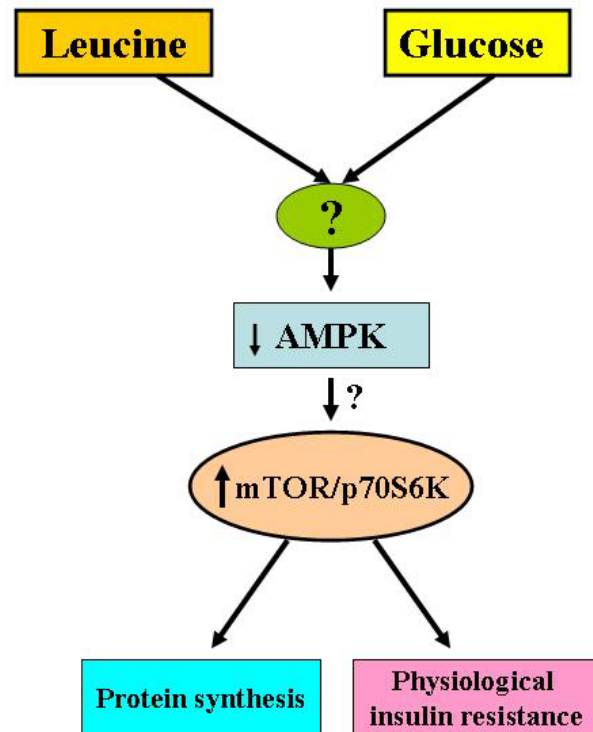

**Table S1.** Effects of compound C on P-AMPK, P-mTOR and protein synthesis in EDL incubated in presence of 5.5 mM glucose

|                                              | Glucose<br>(5 mM) | Compound C<br>(50 $\mu$ M) |
|----------------------------------------------|-------------------|----------------------------|
| P-AMPK/AMPK (AU)                             | 290 $\pm$ 22      | 282 $\pm$ 14               |
| P-mTOR/mTOR (AU)                             | 460 $\pm$ 42      | 481 $\pm$ 30               |
| Protein synthesis<br>(nmol Phe/mg protein/h) | 0.9 $\pm$ 0.16    | 1.0 $\pm$ 0.1              |

EDL muscles were preincubated with Compound C (50  $\mu$ M) for 30 min and additional 1 h in the presence of Krebs-Henseleit buffer containing 5.5 mM glucose. Results are means $\pm$ SE of four experiments.
